# Supplementary material for: Dinuclear CoIIYIIIvs.tetranuclear CoII2YIII2 complexes: the effect of increasing molecular size on magnetic anisotropy and relaxation dynamics
Source: Royal Society of Chemistry journal article supplement (doi:10.1039/c9dt02969a), 2019-01-01
Supplement: c9dt02969a1.pdf [file c9dt02969a1.pdf]

## Supplementary Material

### Dinuclear vs Tetranuclear Co<sup>II</sup>Y<sup>III</sup> complexes: The effect of increasing molecular size on the relaxation dynamics.

Alberto Masegosa, M. Palacios, Eliseo Ruiz, Silvia Gómez-Coca, J. Krzystek, José. M. Moreno, Enrique Colacio

Table S1. Crystallographic data for [ $\{\text{Co}(\mu\text{-L})\text{Y}(\text{NO}_3)\}_2(\mu\text{-CO}_3)_2\} \cdot 2\text{CH}_3\text{OH} \cdot 2\text{H}_2\text{O}$  (**1**).

|                                                                                                                                     |                                                                                               |
|-------------------------------------------------------------------------------------------------------------------------------------|-----------------------------------------------------------------------------------------------|
| Formula                                                                                                                             | C <sub>54</sub> H <sub>86</sub> N <sub>8</sub> O <sub>24</sub> Co <sub>2</sub> Y <sub>2</sub> |
| Mw                                                                                                                                  | 1526.98                                                                                       |
| Crystal system                                                                                                                      | Monoclinic                                                                                    |
| Space group (no.)                                                                                                                   | P21/n (14)                                                                                    |
| a (Å)                                                                                                                               | 12.959(3)                                                                                     |
| b (Å)                                                                                                                               | 12.394(3)                                                                                     |
| c (Å)                                                                                                                               | 19.345(4)                                                                                     |
| α (°)                                                                                                                               | 90.000(3)                                                                                     |
| β (°)                                                                                                                               | 94.40(3)                                                                                      |
| γ (°)                                                                                                                               | 90.000(3)                                                                                     |
| V (Å <sup>3</sup> )                                                                                                                 | 3097.9(11)                                                                                    |
| Z                                                                                                                                   | 2                                                                                             |
| D <sub>c</sub> (g cm <sup>-3</sup> )                                                                                                | 1.637                                                                                         |
| μ(MoK <sub>α</sub> ) (mm <sup>-1</sup> )                                                                                            | 2.468                                                                                         |
| T (K)                                                                                                                               | 100(2)                                                                                        |
| Observed reflections <sup>a</sup>                                                                                                   | 6376 (5534)                                                                                   |
| R <sub>int</sub>                                                                                                                    | 0.0536 (0.0290)                                                                               |
| Parameters                                                                                                                          | 433                                                                                           |
| GOF                                                                                                                                 | 1.117                                                                                         |
| R1 <sup>b</sup>                                                                                                                     | 0.0413 (0.0305)                                                                               |
| wR2 <sup>c</sup>                                                                                                                    | 0.0749 (0.0695)                                                                               |
| Largest peak and hole (e Å <sup>-3</sup> )                                                                                          | 0.432 and -0.866                                                                              |
| <sup>a</sup> Values in parentheses for reflections with I > 2σ(I).                                                                  |                                                                                               |
| <sup>b</sup> R1 = Σ   Fo  -  Fc   / Σ  Fo .                                                                                         |                                                                                               |
| <sup>c</sup> wR2 = {Σ[w(Fo <sup>2</sup> - Fc <sup>2</sup> ) <sup>2</sup> ] / Σ[w(Fo <sup>2</sup> ) <sup>2</sup> ]} <sup>1/2</sup> . |                                                                                               |

Table S2. Selected distances and angles for [ $\{\text{Co}(\mu\text{-L})\text{Y}(\text{NO}_3)\}_2(\mu\text{-CO}_3)_2\} \cdot 2\text{CH}_3\text{OH} \cdot 2\text{H}_2\text{O}$  (**1**).

| Bond   | amstrongs  | Bond/distance | armstrongs |
|--------|------------|---------------|------------|
| Co2-N1 | 2.182(2)   | Y1-O5         | 2.3607(17) |
| Co2-N2 | 2.199(2)   | Y1-O5 (I)     | 2.3530(17) |
| Co2-N3 | 2.250(2)   | Y1-O7         | 2.3886(17) |
| Co2-O2 | 2.1542(17) | Y1-O9         | 2.5818(18) |
| Co2-O3 | 2.0998(18) | Y1-O10        | 2.4613(18) |
| Co2-O6 | 2.0708(17) | Y1...Co2      | 3.4873(7)  |
| Y1-N7  | 2.955(2)   | Co2...Co2 (I) | 8.278(2)   |

|                                                                                    |                |                 |                |
|------------------------------------------------------------------------------------|----------------|-----------------|----------------|
| Y1-O2                                                                              | 2.2939(17)     | Y1...Y1 (I)     | 3.9987(10)     |
| Y1-O3                                                                              | 2.2833(17)     | Co2...Co2 (II)  | 8.290(2)       |
| Y1-O4                                                                              | 2.5328(19)     | Co2...Co2 (III) | 8.4321(15)     |
| I= 1-x, 1-y, -z; II= -x, 1-y, -z; III= 1/2-x, -1/2+y, 1/2-z or 1/2-x, 1/2+y, 1/2-z |                |                 |                |
| <b>Angle</b>                                                                       | <b>degrees</b> | <b>Angle</b>    | <b>degrees</b> |
| N1-Co2-N2                                                                          | 80.44(8)       | O3-Co2-N3       | 90.18(8)       |
| N1-Co2-N3                                                                          | 102.10(8)      | O3-Co2-O2       | 77.37(7)       |
| N2-Co2-N3                                                                          | 80.42(8)       | O6-Co2-N1       | 96.18(8)       |
| O2-Co2-N1                                                                          | 90.04(7)       | O6-Co2-N2       | 167.60(7)      |
| O2-Co2-N2                                                                          | 98.20(7)       | O6-Co2-N3       | 88.70(8)       |
| O2-Co2-N3                                                                          | 167.31(7)      | O6-Co2-O2       | 93.72(7)       |
| O3-Co2-N1                                                                          | 166.25(7)      | O6-Co2-O3       | 90.17(7)       |
| O3-Co2-N2                                                                          | 95.76(8)       |                 |                |

Table S3.- Continuous Shape Measures calculation for the CoN<sub>3</sub>O<sub>3</sub> coordination polyhedron of

1.

-----  
 S H A P E v2.1 Continuous Shape Measures calculation  
 (c) 2013 Electronic Structure Group, Universitat de Barcelona  
 Contact: llunell@ub.edu  
 -----

JPPY-6 5 C5v Johnson pentagonal pyramid J2  
 TPR-6 4 D3h Trigonal prism  
 OC-6 3 Oh Octahedron  
 PPY-6 2 C5v Pentagonal pyramid  
 HP-6 1 D6h Hexagon

Structure [ML6] JPPY-6 TPR-6 OC-6 PPY-6 HP-6  
 , 25.478, 11.801, 1.444, 22.035, 30.762

Table S4.- Contributions to *D*-tensor from CASSCF QDPT calculations.

| Compound                    | 1        |          |
|-----------------------------|----------|----------|
|                             | <i>D</i> | <i>E</i> |
| <sup>4</sup> Φ <sub>1</sub> | 52.477   | -52.062  |
| <sup>4</sup> Φ <sub>2</sub> | 31.225   | -30.306  |
| <sup>4</sup> Φ <sub>3</sub> | -2.333   | 0.813    |
| <sup>4</sup> Φ <sub>4</sub> | -6.439   | 1.340    |
| <sup>4</sup> Φ <sub>5</sub> | -4.410   | 1.342    |

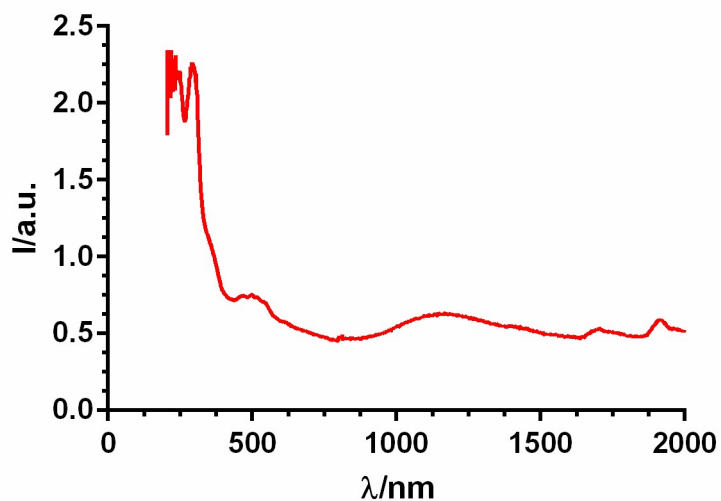

**Figure S1** .- UV-vis-NIR solid state reflectance spectra for **1**.

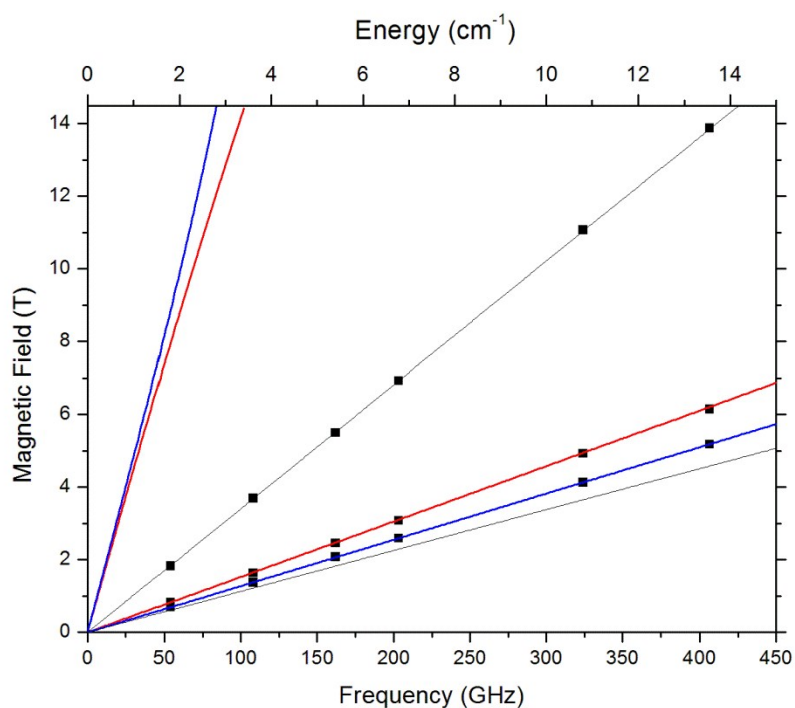

**Figure S2.** Field vs. frequency (or energy) dependence of the turning points in the powder spectra of **1** at 5 K. The squares represent experimental resonances while the lines were drawn using the same spin Hamiltonian parameters as in caption to Figure 3. Red lines: turning points with magnetic field parallel to the  $x$ -axis of the zero-field splitting tensor; blue lines:  $B_0 \parallel y$ ; black lines:  $B_0 \parallel z$ . The lines that have no squares on them represent

turning points of the intra-Kramers transition within the  $m_s = \pm 3/2$  doublet, which is not populated at low temperature, as  $D$  is large, and positive.

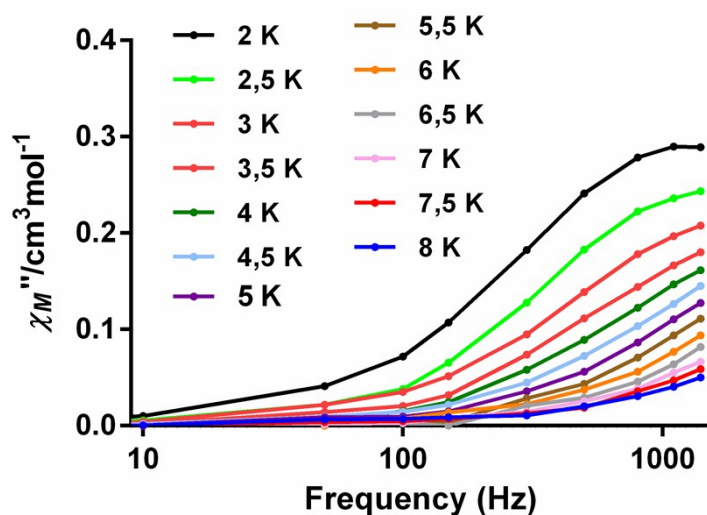

**Figure S3.**- Frequency dependence of the out-of-phase ac susceptibility for **1** under a magnetic field of 0.025 T at different temperatures.

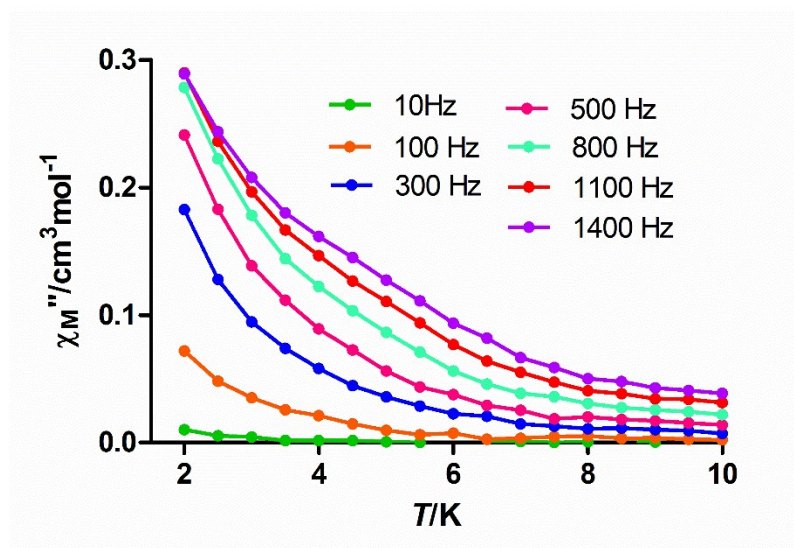

**Figure S4.**- Temperature dependence of the out-of-phase ac susceptibility for **1** under a magnetic field of 0.025 T at different frequencies.

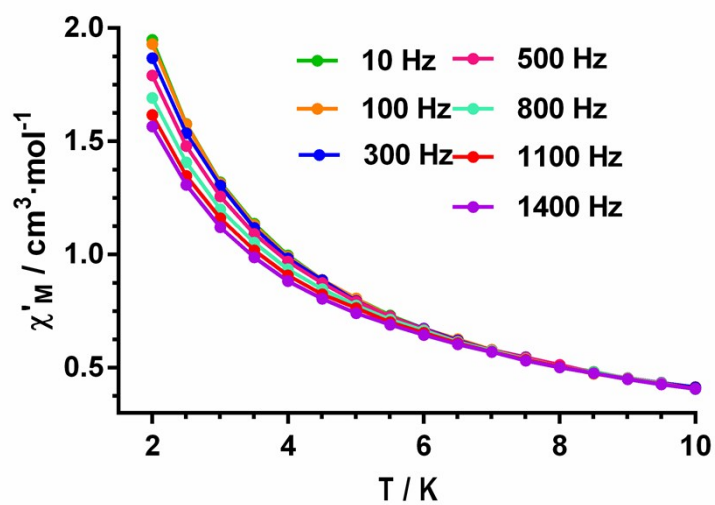

**Figure S5.-** Temperature dependence of the in-phase ac susceptibility for **1** under a magnetic field of 0.025 T at different frequencies.

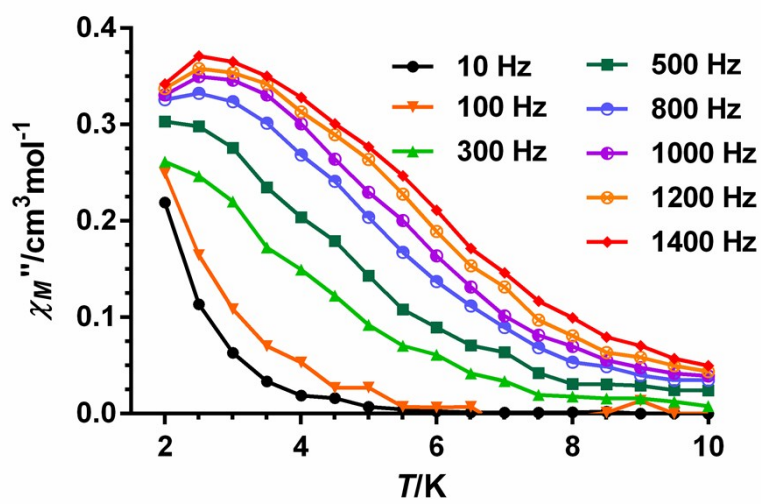

**Figure S6.-** Temperature dependence of the out-of-phase ac susceptibility for **1** under a magnetic field of 0.2 T at different frequencies.

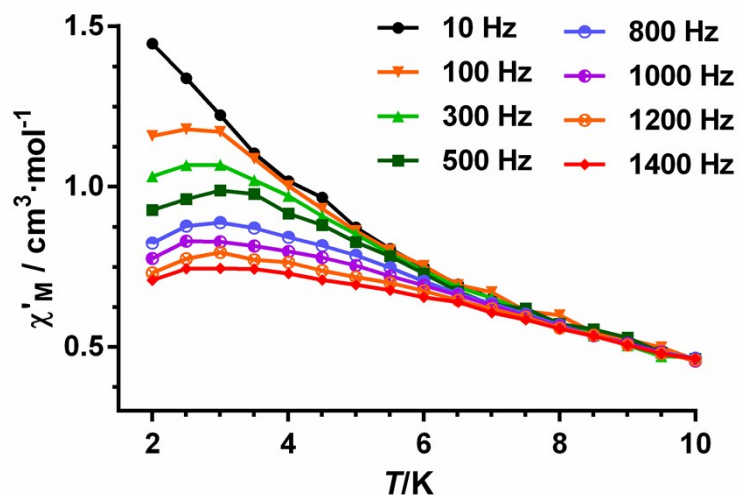

**Figure S7.-** Temperature dependence of the in-phase ac susceptibility for **1** under a magnetic field of 0.2 T at different frequencies.

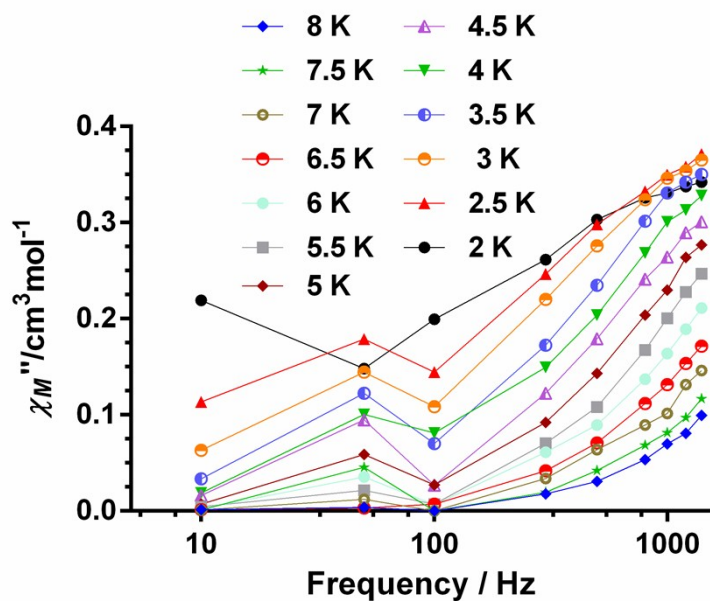

**Figure S8.-** Frequency dependence of the out-of-phase ac susceptibility for **1** under a magnetic field of 0.20 T at different temperatures

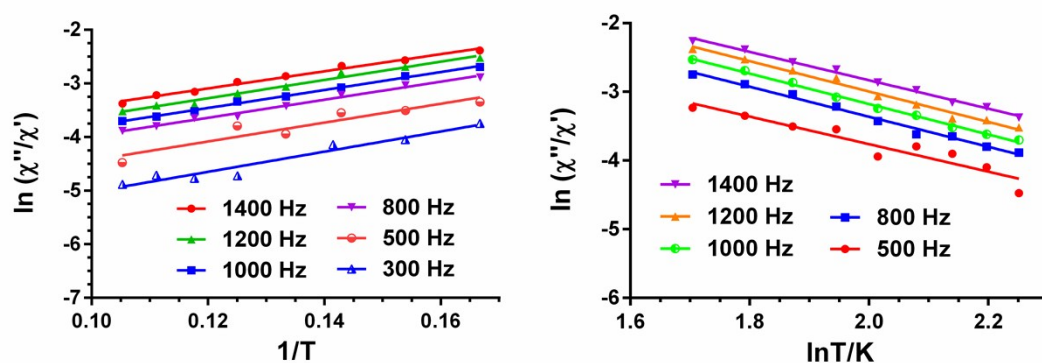

**Figure S9.-** Temperature dependence of the ratio of the in-phase and out-of-phase *ac* components at different frequencies under a magnetic field of 0.2 T for **1**. Solid lines correspond to the fit of the experimental data to equation 4 (left) and equation 5 (right).

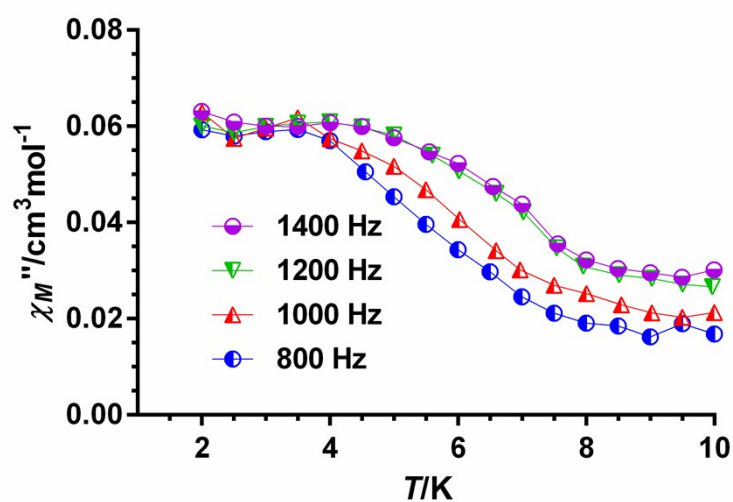

**Figure S10.-** Temperature dependence of the out-of-phase *ac* susceptibility for **1'** under a magnetic field of 0.20 T at different frequencies.

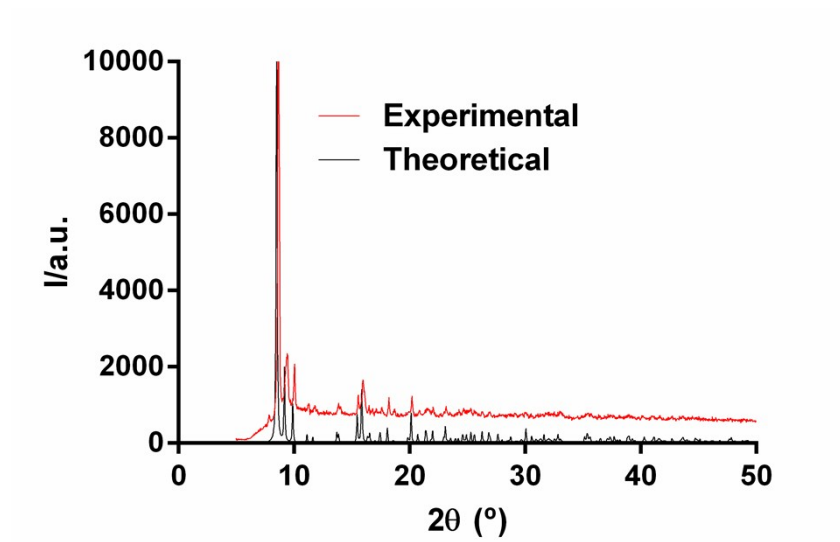

**Figure S11.**- Experimental and calculated Powder X-Ray diffraction diagrams for **1'**.
